# Supplementary material
Source: PubMed Central journal article supplement (PMC4083015)
Supplement: NIHMS580006-supplement-01.pdf [file NIHMS580006-supplement-01.pdf]

## **APPENDIX**

### ***Patient Genotypes Impact Survival After Surgery For Isolated Congenital Heart Disease***

#### **Running title: VEGFA / SOD2 and Long-Term Survival**

Daniel Seung Kim, B.S.<sup>1,2</sup>, Jerry H. Kim, M.D.<sup>3</sup>, Amber A. Burt, M.S.<sup>1</sup>, David R. Crosslin, Ph.D.<sup>1,2</sup>, Nancy Burnham, M.S.N.<sup>4</sup>, Donna M. McDonald-McGinn, M.S.<sup>5</sup>, Elaine H. Zackai, M.D.<sup>5</sup>, Susan C. Nicolson, M.D.<sup>6</sup>, Thomas L. Spray, M.D.<sup>4</sup>, Ian B. Stanaway, B.S.<sup>2</sup>, Deborah A. Nickerson, Ph.D.<sup>2</sup>, Mark W. Russell, M.D.<sup>7</sup>, Hakon Hakonarson, M.D., Ph.D.<sup>8</sup>, J. William Gaynor, M.D.<sup>4</sup>, Gail P. Jarvik, M.D., Ph.D.<sup>1,2\*</sup>

Departments of Medicine (Division of Medical Genetics)<sup>1</sup>, Genome Sciences<sup>2</sup>, and Anesthesiology and Pain Medicine<sup>3</sup>  
University of Washington School of Medicine, Seattle, WA.

Divisions of Cardiothoracic Surgery<sup>4</sup>, Genetics<sup>5</sup>, Cardiothoracic Anesthesiology<sup>6</sup>, and the Center for Applied Genomics<sup>8</sup>  
The Children's Hospital of Philadelphia, Philadelphia, PA

and

Department of Pediatrics and Communicable Diseases (Division of Pediatric Cardiology)<sup>7</sup>,  
University of Michigan Medical School, Ann Arbor, MI

**Meeting Presentation:** J. Maxwell Chamberlain Memorial Paper for Congenital Heart Surgery:  
*Vascular Endothelial Growth Factor and Superoxide Dismutase Gene Variants Have an Additive Adverse Effect on Covariate-Adjusted Transplant Free Survival after Surgery for Isolated Congenital Heart Disease.*

Society of Thoracic Surgeons 50<sup>th</sup> Annual Meeting, Orlando, FL  
January 27<sup>th</sup>, 2014

*This work was supported by a grant from the Fannie E. Rippel Foundation, an American Heart Association National Grant-in-Aid (9950480N), HL071834 from the National Institutes of Health, and a Washington State Life Sciences Discovery Award to the Northwest Institute for Genetic Medicine. DSK was supported in part by the Sarnoff Cardiovascular Research Fellowship for Medical Students, the Benjamin and Margaret Hall Endowed Fellowship in Genome Sciences, NIH 5T31HG000035-18 and 1F31MH101905-01. JHK was supported by NCRR Grant KL2 TR000421.*

#### **Corresponding Author:**

Gail P. Jarvik, M.D., Ph.D.  
Medical Genetics, Box 357720  
University of Washington  
Seattle, WA 98195-7720  
Phone: 1-206-221-3974 / Fax: 1-206-543-3050  
Email: [pair@u.washington.edu](mailto:pair@u.washington.edu)

## **Supplemental Methods:**

### ***Operative Management***

Details about the operative management of patients in this cohort have been previously reported(1,2). In brief, alpha-stat blood gas management and modified ultrafiltration were used in all patients. DHCA was used at the surgeon's discretion, and if used, patients first underwent core and topical hypothermia to a nasopharyngeal temperature of 18°C.

### ***Data Collection***

Subjects who were  $\leq 6$  months of age and undergoing major surgical treatment of CHDs with CPB or DHCA were eligible for preoperative enrollment. Exclusion criteria for the original cohort included: (1) multiple congenital anomalies, (2) medical geneticist determination of likely genetic or phenotypic syndrome other than chromosome 22q-, and (3) language other than English spoken in the home.

Data on preoperative factors that might affect postsurgical outcomes, including gestational age, birth head circumference, and birth weight, were obtained from hospital records. Weight and age at surgery were recorded for the initial operation and for subsequent procedures with CPB.

Operative variables were recorded, including the durations of CPB and DHCA, lowest nasopharyngeal temperature, and hematocrit level after hemodilution. Hospital length of stay (LOS) was recorded for the initial hospitalization. The postoperative LOS outcome is a measure of postoperative morbidity, and may reflect dysfunction in any of a multitude of organ systems.

### ***Genotyping***

Whole blood or buccal swab samples were obtained before surgery and were stored at 4°C. Genomic DNA was isolated from WBCs and genotyping was performed using the Illumina HumanHap 550k BeadChip at the University of Pennsylvania Center for Applied Genomics. Copy number variation was not included in these analyses. High quality SNP data was retained by eliminating patients with call rates < 97% and genetic variants with call rates < 99%. In addition, all genetic variants with a minor allele frequency (MAF) of < 0.5% (for power considerations) and SNPs that were out of Hardy-Weinberg equilibrium (HWE) ( $p < 10^{-6}$ ) were removed from analyses. After these filters, 514,139 SNPs remained with a genotyping rate of 99.772%. Of the 494 non-syndromic subjects, 422 had genotype data that passed quality control and were considered in these analyses.

### ***Analysis of Immediate Morbidity and Mortality Outcomes***

Logistic/linear regression analyses were performed in PLINK (<http://pngu.mgh.harvard.edu/~purcell/plink/>), with survival analyses and graphics produced by R (<http://www.r-project.org/>). We employed separate techniques to test association with our outcome measures. Linear regression was used for the continuous post-operative LOS data, which were Winsorized (extreme values set to 3 standard deviations from the mean, or 40.43 days) to obtain an approximate normal distribution. Post-operative LOS was first adjusted through a separate regression model for the following potentially confounding variables: the first 3 principal component eigenvectors for race, gender, gestational age, gestational weight, diagnostic class, preoperative intubation, preoperative LOS, age at first operation, weight at first operation, total CPB time, use of DHCA, total DHCA time, and hematocrit at first operation.

These surgical covariates had previously been determined to influence outcomes. After covariate adjustments the residuals became the predicted variables for testing genotype effects utilizing an additive model and linear regression. The same analyses were performed for post-operative mortality using logistic regression methods.

## Supplemental Results on Outcomes Not Presented in the Primary Manuscript

Post-operative LOS and long-term survival were correlated with each other, with a pairwise correlation coefficient  $r = 0.47$ . The overall mean post-operative LOS was  $11.4 \pm 9.7$  days, but 21.4 days for those who suffered operative deaths and 11.0 days for those who did not (see **Table 2**).

Post-operative LOS was associated with two SNPs: *CYP2E1* intergenic SNP rs10776686 (Beta Coefficient = 6.71,  $p = 0.016$ ; **Table 3**) and *EPHX1* Tyr113His missense rs1051740 (Beta Coefficient = -4.10,  $p = 5.04 \times 10^{-3}$ ). We note that with removal of the 16 subjects who suffered early mortality following surgery, only the *EPHX1* SNP rs1051740 was significantly associated with post-operative LOS ( $p = 0.049$ ). The carriers of the *CYP2E1* minor allele had a mean covariate-adjusted LOS of 6.7 days longer than those with only the major alleles. In contrast, the covariate-adjusted mean post-operative LOS was 4.1 days shorter for each copy of the *EPHX1* Tyr113His missense SNP.

Though underpowered with only 16 cases, we sought to determine if genetic variants predicted initial post-operative mortality, which was correlated with post-operative LOS (pairwise correlation coefficient  $r = 0.53$ ). Using logistic regression methods adjusting for the same confounding variables as in our other analyses, we found that the same two SNPs that were associated with post-operative LOS were also significant for initial post-operative mortality: *CYP2E1* intergenic SNP rs10776686 (OR = 216.1,  $p = 3.03 \times 10^{-3}$ ) and *EPHX1* Tyr113His missense rs1051740 (OR = 0.091,  $p = 0.044$ ). Taken in conjunction, both the *EPHX1* SNP

rs1051740 and *CYP2E1* intergenic SNP rs10776686 were significant at the Bonferroni-adjusted level ( $p \leq 8.3 \times 10^{-3}$ ) for one of these outcomes, respectively, though with the caveat that the analyses were underpowered. All test results are summarized in **Appendix Table S2**.

## Supplemental Discussion on *CYP2E1* and *EPHX1* Mechanisms of Oxidative Stress

As expected due to the correlated outcomes, the *CYP2E1* and *EPHX1* SNP effect directions were consistent for both initial operative mortality and post-operative LOS. The minor allele at *CYP2E1* intergenic SNP rs10776686 was associated with both increased operative mortality and a longer stay. The functional variant for our *CYP2E1* findings is likely rs2031920, a 5'UTR variant that is in LD ( $r^2 = 1.0$ ) with our tagging intergenic SNP. Rs2031920, originally identified as a restriction fragment-length polymorphism (when exposed to *RsaI*), has been reported to cause approximately ten-fold increase in gene expression of *CYP2E1*(3). Increased *CYP2E1* expression may result in poorer postsurgical outcomes through a variety of mechanisms. First, the *CYP2E1* enzyme has been reported to generate reactive oxygen species even in the absence of substrate(4); thus, in the context of increased gene expression, *CYP2E1* enzymatic activity may increase oxidative injury in a range of tissues including the myocardium. This hypothesis is supported by the finding of increased *CYP2E1* expression in end-stage dilated cardiomyopathy and ischemic heart disease, compared to healthy myocardium(5).

The *EPHX1* rs1051740 Tyr113His allele was found to be protective and was associated with decreased LOS and mortality. Epoxide hydrolase 1 is an important enzyme for chemical detoxification; the studied genetic variant, *EPHX1* Tyr113His, decreases enzyme activity, and has been associated with elevated measures of oxidative stress(6). However, the mechanisms of oxidative stress regulation are not well understood and microsomal epoxide hydrolase (*EPHX1*) may have differential effects on oxidative stress management and tissue injury depending on the setting and other factors. It has been well established that inhibition of the soluble epoxide

hydrolase (EPHX2) is cardioprotective(7). Therefore, while EPHX1 is clearly involved in oxidative stress management, how it affects oxidative stress burden in this setting or whether oxidative stress regulation is the foundation for our observed genetic effect on outcomes remains to be determined.



**Appendix Table S1. Summary of literature of studied SNPs.**

| SNP        | Gene <sup>a</sup> | Variant Type | Oxidative Stress Category <sup>b</sup>     | Summary of Gene Function and Literature Findings                                                                                                                                                                                                                                                                                                                                                                                                                                                                                                                                                                   |
|------------|-------------------|--------------|--------------------------------------------|--------------------------------------------------------------------------------------------------------------------------------------------------------------------------------------------------------------------------------------------------------------------------------------------------------------------------------------------------------------------------------------------------------------------------------------------------------------------------------------------------------------------------------------------------------------------------------------------------------------------|
| rs1051740  | <i>EPHX1</i>      | Tyr113His    | Detoxification                             | Enzyme converts epoxides to non-toxic forms. Inhibition of soluble epoxide hydrolase is cardioprotective(7). Missense mutation associated with: lung and other tobacco-related cancers(8), ovarian cancer(9), and numerous pharmacogenetic interactions with phenytoin(10), among other drugs.                                                                                                                                                                                                                                                                                                                     |
| rs2758331  | <i>SOD2</i>       | Intronic     | Detoxification                             | Enzyme detoxifies superoxide byproducts of mitochondrial respiration. Tags <i>SOD2</i> Val16Ala missense SNP, rs4880 ( $r^2 = 0.93$ ), which increases enzyme activity by approximately 33%(11) and has also been associated with coronary artery disease in female diabetics(12), and a decreased risk of human pancreatic cancers(13).                                                                                                                                                                                                                                                                           |
| rs10776686 | ( <i>CYP2E1</i> ) | Intergenic   | Free radical generation and detoxification | Enzyme involved in metabolic and other detoxifying processes. SNP tags, by linkage disequilibrium, <i>CYP2E1</i> 5'UTR SNP rs2031920 ( $r^2 = 1.0$ ), which increases <i>CYP2E1</i> expression ~ten-fold(3,14). <i>CYP2E1</i> activity can generate reactive oxygen species in the absence of substrate(4) and has increased expression levels in end-stage dilated cardiomyopathy and ischemic heart disease(5). <i>CYP2E1</i> also metabolizes halothane and related volatile anesthetics(15), alcohol(16), tobacco(17), and other carcinogens(18); the 5'UTR variant is associated with many cancers(17,19,20). |
| rs1001179  | <i>CAT</i>        | 5'UTR        | Detoxification                             | Enzyme is key peroxisome-associated antioxidant protein. SNP associated with increased transcriptional activity of the <i>CAT</i> gene(21) and increased risk of postmenopausal breast cancer in conjunction with hormone replacement therapy(22).                                                                                                                                                                                                                                                                                                                                                                 |

|          |              |           |                                                         |                                                                                                                                                                                                                                                                                                                                                                                                                                                                                                                                                                                                                                                                                                                                                                                          |
|----------|--------------|-----------|---------------------------------------------------------|------------------------------------------------------------------------------------------------------------------------------------------------------------------------------------------------------------------------------------------------------------------------------------------------------------------------------------------------------------------------------------------------------------------------------------------------------------------------------------------------------------------------------------------------------------------------------------------------------------------------------------------------------------------------------------------------------------------------------------------------------------------------------------------|
| rs833069 | <i>VEGFA</i> | Intronic  | Vascular response and cell survival                     | Protein is involved in vascular permeability during inflammation and growth/apoptosis-inhibition. SNP tags 5'UTR <i>VEGFA</i> SNP, rs2010963 ( $r^2 = 0.97$ ), which increases <i>VEGFA</i> expression(23). <i>VEGFA</i> is protective from risk of adverse cardiovascular events after myocardial infarction(24), and exogenous vascular endothelial growth factor can rescue cardiac function in late-stage ischemic heart disease(25) and after myocardial infarction(26). <i>VEGFA</i> also has roles in inflammation and cell survival(27): the 5'UTR SNP is positively associated with the disease time-course and severity of proliferative diabetic retinopathy(28,29), yet protective for psoriatic arthritis(30), and amyotrophic lateral sclerosis(31), among other diseases. |
| rs5370   | <i>EDNI</i>  | Lys198Asn | Replication of Kirshbom(32) findings; vascular response | Protein is a pro-peptide of endothelin-1, a potent vasoconstrictor. Missense mutation associated with poorer transplant-free survival in children with single-ventricle CHD(32), asthma and atopic asthma(33), delayed onset of type 2 diabetes and retinopathy(34), decreased high-density lipoprotein cholesterol(35), and blood pressure levels (36).                                                                                                                                                                                                                                                                                                                                                                                                                                 |

<sup>a</sup> = Intergenic SNP naming the nearest gene.

**Appendix Table S2. Results of association tests for 6 SNPs for initial operative mortality, postoperative length of stay, and long-term mortality.**

| SNP                                             | Gene <sup>a</sup>      | OR/Beta/HR<br>(95% CI)    | P                           |
|-------------------------------------------------|------------------------|---------------------------|-----------------------------|
| <b>Initial Operative Mortality<sup>b</sup></b>  |                        |                           |                             |
| <b>rs1051740</b>                                | <b><i>EPHX1</i></b>    | <b>0.09 (0.0089-0.94)</b> | <b>0.044</b>                |
| rs5370                                          | <i>EDNI</i>            | 0.67 (0.18-2.48)          | 0.552                       |
| rs833069                                        | <i>VEGFA</i>           | 0.55 (0.15-1.98)          | 0.360                       |
| rs2758331                                       | <i>SOD2</i>            | 0.93 (0.29-3.01)          | 0.901                       |
| <b>rs10776686</b>                               | <b>(<i>CYP2E1</i>)</b> | <b>216.1 (6.18-7553)</b>  | <b>3.03x10<sup>-3</sup></b> |
| rs1001179                                       | <i>CAT</i>             | 3.01 (0.75-12.07)         | 0.12                        |
| <b>Postoperative Length of Stay<sup>c</sup></b> |                        |                           |                             |
| <b>rs1051740</b>                                | <b><i>EPHX1</i></b>    | <b>-4.10</b>              | <b>5.04x10<sup>-3</sup></b> |
| rs5370                                          | <i>EDNI</i>            | -2.73                     | 0.067                       |
| rs833069                                        | <i>VEGFA</i>           | -0.95                     | 0.470                       |
| rs2758331                                       | <i>SOD2</i>            | -0.41                     | 0.740                       |
| <b>rs10776686</b>                               | <b>(<i>CYP2E1</i>)</b> | <b>6.71</b>               | <b>0.016</b>                |
| rs1001179                                       | <i>CAT</i>             | 1.11                      | 0.510                       |
| <b>Long-Term Survival<sup>d</sup></b>           |                        |                           |                             |
| rs1051740                                       | <i>EPHX1</i>           | 1.06 (0.59-1.88)          | 0.850                       |
| rs5370                                          | <i>EDNI</i>            | 0.88 (0.51-1.53)          | 0.662                       |
| <b>rs833069</b>                                 | <b><i>VEGFA</i></b>    | <b>0.37 (0.21-0.66)</b>   | <b>7.03x10<sup>-4</sup></b> |
| <b>rs2758331</b>                                | <b><i>SOD2</i></b>     | <b>0.52 (0.30-0.90)</b>   | <b>0.019</b>                |
| rs10776686                                      | ( <i>CYP2E1</i> )      | 0.91 (0.25-3.31)          | 0.881                       |
| rs1001179                                       | <i>CAT</i>             | 0.73 (0.39-1.37)          | 0.331                       |
| <b>Transplant-Free Survival<sup>d,e</sup></b>   |                        |                           |                             |
| rs1051740                                       | <i>EPHX1</i>           | 0.90 (0.53-1.55)          | 0.713                       |
| rs5370                                          | <i>EDNI</i>            | 0.68 (0.41-1.16)          | 0.162                       |
| <b>rs833069</b>                                 | <b><i>VEGFA</i></b>    | <b>0.47 (0.29-0.78)</b>   | <b>3.35x10<sup>-3</sup></b> |

|                  |                    |                         |              |
|------------------|--------------------|-------------------------|--------------|
| <b>rs2758331</b> | <b><i>SOD2</i></b> | <b>0.62 (0.39-0.98)</b> | <b>0.040</b> |
| rs10776686       | ( <i>CYP2E1</i> )  | 2.11 (0.77-5.75)        | 0.142        |
| rs1001179        | <i>CAT</i>         | 0.95 (0.53-1.69)        | 0.858        |

CI = Confidence Interval. HR = Hazard Ratio from survival analyses. Beta = Linear regression coefficient. OR = Odds Ratio from logistic regression analyses; OR > 1 indicates increased rate of death. SNP = single nucleotide polymorphism.

<sup>a</sup> Intergenic SNPs are represented in parentheses naming the nearest gene, e.g. (*CYP2E1*).

<sup>b</sup> OR and 95% CI were calculated using logistic regression for the outcome of initial operative mortality, adjusting for the covariates listed in the methods.

<sup>c</sup> Beta coefficients were calculated through linear regression for the outcome of postoperative length of stay, adjusting for the covariates listed in the methods.

<sup>d</sup> HR and 95% CI were calculated using Kaplan-Meier and Cox proportional hazards methods for the outcome of long-term survival, adjusting for the covariates listed in the methods.

<sup>e</sup> Transplant-free survival included cardiac transplantation as an endpoint (in addition to death) for survival analyses, using the methods outlined in <sup>d</sup>.

**Appendix Table S3. VEGFA SNP rs833069 minor allele is associated with worse diagnostic class.**

|                  | VEGFA SNP rs833069 genotype |              |       |    |
|------------------|-----------------------------|--------------|-------|----|
|                  | Major                       | Heterozygous | Minor |    |
| Diagnostic Class | Class 1                     | 114          | 74    | 15 |
|                  | Class 2                     | 15           | 16    | 10 |
|                  | Class 3                     | 22           | 17    | 6  |
|                  | Class 4                     | 33           | 66    | 28 |

Cochran-Armitage Test of Trend Statistics (two-sided alternative hypothesis):

Z statistic = 5.34

P =  $9.12 \times 10^{-8}$

**Appendix Table S4. VEGFA SNP rs833069 minor allele is associated with Hypoplastic Left Heart Syndrome (HLHS).**

|         | VEGFA SNP rs833069 genotype |              |       |
|---------|-----------------------------|--------------|-------|
|         | Major                       | Heterozygous | Minor |
| No HLHS | 152                         | 107          | 31    |
| HLHS    | 32                          | 66           | 28    |

Cochran-Armitage Test of Trend Statistics (two-sided alternative hypothesis):

Z statistic = 5.14

P =  $2.82 \times 10^{-7}$

All 131 HLHS subjects categorized into class 4.

**Appendix Table S5. *VEGFA* SNP rs833069 major allele is associated with Tetralogy of Fallot (TOF).**

| <i>VEGFA</i> SNP rs833069 genotype |       |              |       |
|------------------------------------|-------|--------------|-------|
|                                    | Major | Heterozygous | Minor |
| No TOF                             | 144   | 148          | 55    |
| TOF                                | 40    | 25           | 4     |

Cochran-Armitage Test of Trend Statistics (two-sided alternative hypothesis):

Z statistic = -2.86

P = 0.0042

67/69 TOF subjects categorized in class 1; remainder in class 3.

**Appendix Table S6. *VEGFA* SNP rs833069 major allele is associated with Transposition of the Great Arteries (TGA).**

| <i>VEGFA</i> SNP rs833069 genotype |       |              |       |
|------------------------------------|-------|--------------|-------|
|                                    | Major | Heterozygous | Minor |
| No TGA                             | 152   | 156          | 56    |
| TGA                                | 32    | 17           | 3     |

Cochran-Armitage Test of Trend Statistics (two-sided alternative hypothesis):

Z statistic = -2.82

P = 0.0048

49/52 TGA subjects categorized in class 1; remainder in class 2.

**Appendix Table S7. Associations of *VEGFA*, *SOD2*, and genetic risk score with transplant-free survival stratified by diagnostic class.**

|                | <b>Total N</b> | <b>N Events</b> | <b>Association Tested</b> | <b>Hazard Ratio (HR)</b> | <b>P-Value</b> |
|----------------|----------------|-----------------|---------------------------|--------------------------|----------------|
| <b>Class 1</b> | 204            | 8               |                           |                          |                |
|                |                |                 | <i>VEGFA</i>              | 0.28                     | 0.26           |
|                |                |                 | <i>SOD2</i>               | 0.27                     | 0.25           |
|                |                |                 | Genetic Risk Score        | 0.88                     | 0.96           |
| <b>Class 2</b> | 41             | 2               |                           |                          |                |
|                |                |                 | <i>VEGFA</i>              | 0.95                     | 0.99           |
|                |                |                 | <i>SOD2</i>               | 0.082                    | 0.98           |
|                |                |                 | Genetic Risk Score        | 21.77                    | 0.98           |
| <b>Class 3</b> | 46             | 7               |                           |                          |                |
|                |                |                 | <i>VEGFA</i>              | 4.77x 10 <sup>-7</sup>   | 0.32           |
|                |                |                 | <i>SOD2</i>               | 0.00031                  | 0.17           |
|                |                |                 | Genetic Risk Score        | 53.1                     | 0.017          |
| <b>Class 4</b> | 131            | 34              |                           |                          |                |
|                |                |                 | <i>VEGFA</i>              | 0.51                     | 0.037          |
|                |                |                 | <i>SOD2</i>               | 0.56                     | 0.066          |
|                |                |                 | Genetic Risk Score        | 17.49                    | 0.0067         |

## Supplemental References

1. Gaynor JW, Gerdes M, Zackai EH, Bernbaum J, Wernovsky G, Clancy RR, et al. Apolipoprotein E genotype and neurodevelopmental sequelae of infant cardiac surgery. *The Journal of Thoracic and Cardiovascular Surgery*. 2003 Dec;126(6):1736–45.
2. Gaynor JW, Nord AS, Wernovsky G, Bernbaum J, Solot CB, Burnham N, et al. Apolipoprotein E Genotype Modifies the Risk of Behavior Problems After Infant Cardiac Surgery. *PEDIATRICS*. 2009 Jun 29;124(1):241–50.
3. Hayashi S, Watanabe J, Kawajiri K. Genetic polymorphisms in the 5'-flanking region change transcriptional regulation of the human cytochrome P450IIIE1 gene. *Journal of Biochemistry. Jpn Biochemical Soc. Jpn Biochemical Soc*; 1991;110(4):559–65.
4. Novak RF, Woodcroft KJ. The alcohol-inducible form of cytochrome P450 (CYP2E1): role in toxicology and regulation of expression. *Archives of pharmacal research. Springer*; 2000;23(4):267–82.
5. Sidorik L, Kyyamova R, Bobyk V, Kapustian L, Rozhko O, Vigontina O, et al. Molecular chaperone, HSP60, and cytochrome P450 2E1 co-expression in dilated cardiomyopathy. *Cell Biology International*. 2005 Jan;29(1):51–5.
6. Vibhuti A, Arif E, Deepak D, Singh B, Qadar Pasha MA. Genetic polymorphisms of GSTP1 and mEPHX correlate with oxidative stress markers and lung function in COPD. *Biochemical and Biophysical Research Communications*. 2007 Jul;359(1):136–42.
7. Qiu H, Li N, Liu J-Y, Harris TR, Hammock BD, Chiamvimonvat N. Soluble Epoxide Hydrolase Inhibitors and Heart Failure. *Cardiovascular Therapeutics*. 2011 Feb 24;29(2):99–111.
8. Lee J, Dahl M, Nordestgaard BG. Genetically Lowered Microsomal Epoxide Hydrolase Activity and Tobacco-Related Cancer in 47,000 Individuals. *Cancer Epidemiology Biomarkers & Prevention*. 2011 Aug 7;20(8):1673–82.
9. Goode EL, White KL, Vierkant RA, Phelan CM, Cunningham JM, Schildkraut JM, et al. Xenobiotic-Metabolizing gene polymorphisms and ovarian cancer risk. *Mol. Carcinog*. 2010 Dec 28;50(5):397–402.
10. Strickler SM, Dansky LV, Miller MA, Seni MH, Andermann E, Spielberg SP. Genetic predisposition to phenytoin-induced birth defects. *Lancet*. 1985 Oct 5;2(8458):746–9.
11. Bastaki M, Huen K, Manzanillo P, Chande N, Chen C, Balmes JR, et al. Genotype-activity relationship for Mn-superoxide dismutase, glutathione peroxidase 1 and catalase in humans. *Pharmacogenet. Genomics*. 2006 Apr;16(4):279–86.
12. Jones DA, Prior SL, Tang TS, Bain SC, Hurel SJ, Humphries SE, et al. Association between the rs4880 superoxide dismutase 2 (C>T) gene variant and coronary heart disease in diabetes mellitus. *Diabetes Research and Clinical Practice*. Elsevier Ireland Ltd; 2009



Nov 1;90(2):196–201.

13. Zhang J, Zhang X, Dhakal IB, Gross MD, Kadlubar FF, Anderson KE. Sequence variants in antioxidant defense and DNA repair genes, dietary antioxidants, and pancreatic cancer risk. *Int J Mol Epidemiol Genet*. 2011 Aug 30;2(3):236–44.
14. Watanabe J, Hayashi S, Kawajiri K. Different regulation and expression of the human CYP2E1 gene due to the RsaI polymorphism in the 5'-flanking region. *Journal of Biochemistry. Jpn Biochemical Soc. Jpn Biochemical Soc*; 1994;116(2):321–6.
15. Spracklin DK, Hankins DC, Fisher JM, Thummel KE, Kharasch ED. Cytochrome P450 2E1 is the principal catalyst of human oxidative halothane metabolism in vitro. *J. Pharmacol. Exp. Ther*. 1997 Apr;281(1):400–11.
16. Lind PA, Macgregor S, Heath AC, Madden PAF, Montgomery GW, Martin NG, et al. Association Between In Vivo Alcohol Metabolism and Genetic Variation in Pathways that Metabolize the Carbon Skeleton of Ethanol and NADH Reoxidation in the Alcohol Challenge Twin Study. *Alcohol Clin Exp Res*. 2012 May 11;36(12):2074–85.
17. Anantharaman D, Samant TA, Sen S, Mahimkar MB. Polymorphisms in tobacco metabolism and DNA repair genes modulate oral precancer and cancer risk. *Oral Oncology*. Elsevier Ltd. Elsevier Ltd; 2011 Sep 1;47(9):866–72.
18. Li Y, Marion M-J, Zipprich J, Santella RM, Freyer G, Brandt-Rauf PW. Gene–environment interactions between DNA repair polymorphisms and exposure to the carcinogen vinyl chloride. *Biomarkers*. 2009 May;14(3):148–55.
19. Vijaykrishnan J, Houlston RS. Candidate gene association studies and risk of childhood acute lymphoblastic leukemia: a systematic review and meta-analysis. *Haematologica*. 2010 Jul 31;95(8):1405–14.
20. Jia WH, Pan QH, Qin HD, Xu YF, Shen GP, Chen L, et al. A Case-control and a family-based association study revealing an association between CYP2E1 polymorphisms and nasopharyngeal carcinoma risk in Cantonese. *Carcinogenesis*. 2009 Dec 11;30(12):2031–6.
21. Forsberg L, Lyrenäs L, de Faire U, Morgenstern R. A common functional C-T substitution polymorphism in the promoter region of the human catalase gene influences transcription factor binding, reporter gene transcription and is correlated to blood catalase levels. *Free Radical Biology and Medicine*. 2001 Mar 1;30(5):500–5.
22. Quick SK, Shields PG, Nie J, Platek ME, McCann SE, Hutson AD, et al. Effect Modification by Catalase Genotype Suggests a Role for Oxidative Stress in the Association of Hormone Replacement Therapy with Postmenopausal Breast Cancer Risk. *Cancer Epidemiology Biomarkers & Prevention*. 2008 May 7;17(5):1082–7.
23. Vailati FB, Crispim D, Sortica DA, Souza BM, Brondani LA, Canani LH. The C Allele of -634G/C Polymorphism in the VEGFA Gene Is Associated with Increased VEGFA Gene

- Expression in Human Retinal Tissue. *Investigative Ophthalmology & Visual Science*. 2012 Sep 4;53(10):6411–5.
24. Matsudaira K, Maeda K, Okumura N, Yoshikawa D, Morita Y, Mitsuhashi H, et al. Impact of Low Levels of Vascular Endothelial Growth Factor After Myocardial Infarction on 6-Month Clinical Outcome. *Circ J*. 2012;76(6):1509–16.
  25. Gordon O, Gilon D, He Z, May D, Lazarus A, Oppenheim A, et al. Vascular Endothelial Growth Factor-Induced Neovascularization Rescues Cardiac Function But Not Adverse Remodeling at Advanced Ischemic Heart Disease. *Arteriosclerosis, Thrombosis, and Vascular Biology*. 2012 Jun 13;32(7):1642–51.
  26. Guo H-D, Cui G-H, Yang J-J, Wang C, Zhu J, Zhang L-S, et al. Sustained delivery of VEGF from designer self-assembling peptides improves cardiac function after myocardial infarction. *Biochemical and Biophysical Research Communications*. Elsevier Inc; 2012 Jul 20;424(1):105–11.
  27. Byrne AM, Bouchier-Hayes DJ, Harmey JH. Angiogenic and cell survival functions of vascular endothelial growth factor (VEGF). *J. Cell. Mol. Med*. 2005 Oct;9(4):777–94.
  28. Al-Kateb H, Mirea L, Xie X, Sun L, Liu M, Chen H, et al. Multiple Variants in Vascular Endothelial Growth Factor (VEGFA) Are Risk Factors for Time to Severe Retinopathy in Type 1 Diabetes: The DCCT/EDIC Genetics Study. *Diabetes*. 2007 Aug 1;56(8):2161–8.
  29. Churchill AJ, Carter JG, Ramsden C, Turner SJ, Yeung A, Brechley PEC, et al. VEGF Polymorphisms Are Associated with Severity of Diabetic Retinopathy. *Investigative Ophthalmology & Visual Science*. 2008 Mar 3;49(8):3611–6.
  30. Butt C, Lim S, Greenwood C, Rahman P. VEGF, FGF1, FGF2 and EGF gene polymorphisms and psoriatic arthritis. *BMC Musculoskelet Disord*. 2007;8(1):1.
  31. Henriques A, Pitzer C, Schneider A. Neurotrophic growth factors for the treatment of amyotrophic lateral sclerosis: where do we stand? *Front. Neurosci*. 2010;4:32.
  32. Kirshbom PM, Mahle WT, Joyner RW, Leong T, Wilson M, Kogon BE, et al. The endothelin-1 G5665T polymorphism impacts transplant-free survival for single ventricle patients. *The Journal of Thoracic and Cardiovascular Surgery*. 2008 Jul;136(1):117–22.
  33. Zhu G, Carlsen K, Carlsen K-H, Lenney W, Silverman M, Whyte MK, et al. Polymorphisms in the endothelin-1 (EDN1) are associated with asthma in two populations. *Genes Immun*. 2007 Oct 25;9(1):23–9.
  34. Li H, Louey JWC, Choy KW, Liu DTL, Chan WM, Chan YM, et al. EDN1 Lys198Asn is associated with diabetic retinopathy in type 2 diabetes. *Mol. Vis*. 2008;14:1698–704.
  35. Paré G, Serre D, Brisson D, Anand SS, Montpetit A, Tremblay G, et al. Genetic Analysis of 103 Candidate Genes for Coronary Artery Disease and Associated Phenotypes in a Founder Population Reveals a New Association between Endothelin-1 and High-Density

Lipoprotein Cholesterol. *The American Journal of Human Genetics*. 2007 Apr;80(4):673–82.

36. Rankinen T, Church T, Rice T, Markward N, Leon AS, Rao DC, et al. Effect of Endothelin 1 Genotype on Blood Pressure Is Dependent on Physical Activity or Fitness Levels. *Hypertension*. 2007 Oct 22;50(6):1120–5.
